# Supplementary material for: Hypertension subtypes at high altitude in Peru: Analysis of the Demographic and Family Health Survey 2016–2019
Source: PubMed Central journal article supplement (PMC11014732; doi:10.1371/journal.pone.0300457), 2024-04-12
Supplement: pone.0300457.s001.pdf [file pone.0300457.s001.pdf]

1 **S1 Table.** General characteristics of participants according to hypertension (N = 122,336).

| perf                         | Without Hypertension<br>% (95% CI) | Hypertension<br>% (95% CI) | <i>p</i> |
|------------------------------|------------------------------------|----------------------------|----------|
| Age                          |                                    |                            | <0.001   |
| 18-44                        | 91.5 (91.2-91.9)                   | 8.5 (8.1-8.8)              |          |
| 45-54                        | 76.1 (75.0-77.1)                   | 23.9 (22.9-25.0)           |          |
| 55-64                        | 63.7 (62.4-65.0)                   | 36.3 (35.0-37.6)           |          |
| 65-74                        | 48.7 (47.0-50.4)                   | 51.3 (49.6-53.0)           |          |
| >75                          | 38.4 (36.3-40.6)                   | 61.6 (59.4-63.7)           |          |
| Sex                          |                                    |                            | <0.001   |
| Female                       | 81.4 (80.9-82.0)                   | 18.6 (18.0-19.1)           |          |
| Male                         | 78.0 (77.3-78.6)                   | 22.0 (21.4-22.7)           |          |
| Area of residence            |                                    |                            | <0.001   |
| Urban                        | 79.0 (78.5-79.5)                   | 21.0 (20.5-21.5)           |          |
| Rural                        | 82.3 (81.7-82.8)                   | 17.7 (17.2-18.3)           |          |
| Level of completed education |                                    |                            | <0.001   |
| No formal education          | 66.4 (65.5-67.3)                   | 33.6 (32.7-34.5)           |          |

|                        |                  |                  |        |
|------------------------|------------------|------------------|--------|
| Primary                | 83.1 (82.3-84.0) | 16.9 (16.0-17.7) |        |
| Secondary              | 83.2 (82.5-83.8) | 16.8 (16.2-17.5) |        |
| Higher                 | 83.7 (83.0-84.3) | 16.3 (15.7-17.0) |        |
| Household wealth index |                  |                  | <0.001 |
| Poorest                | 82.0 (81.4-82.6) | 18.0 (17.4-18.6) |        |
| Poor                   | 82.5 (81.8-83.1) | 17.5 (16.9-18.2) |        |
| Middle                 | 80.6 (79.8-81.4) | 19.4 (18.6-20.2) |        |
| Wealthy                | 77.8 (76.8-78.8) | 22.2 (21.2-23.2) |        |
| Wealthiest             | 75.5 (74.3-76.6) | 24.5 (23.4-25.7) |        |
| BMI                    |                  |                  | <0.001 |
| Underweight / Normal   | 86.6 (86.0-87.1) | 13.4 (12.9-14.0) |        |
| Overweight             | 79.9 (79.3-80.5) | 20.1 (19.5-20.7) |        |
| Obesity                | 69.6 (68.6-70.5) | 30.4 (29.5-31.4) |        |
| Daily smoking status   | 74.2 (70.8-77.4) | 25.8 (22.6-29.2) | <0.001 |
| Self-reported diabetes | 46.5 (43.9-49.1) | 53.5 (50.9-56.1) | <0.001 |
| Altitude               |                  |                  | <0.001 |
| Low altitude           | 78.8 (78.3-79.3) | 21.2 (20.7-21.7) |        |
| High altitude          | 83.0 (82.4-83.6) | 17.0 (16.4-17.6) |        |

2 CI: Confidence interval; BMI: Body Mass Index.

3 **S2 Table.** Association between high altitude and hypertension (avoiding the white coat effect) (N = 110,304).

|              | Crude Model |           |          | Adjusted Model † |           |          |
|--------------|-------------|-----------|----------|------------------|-----------|----------|
|              | cPR         | 95% CI    | <i>p</i> | aPR              | 95% CI    | <i>p</i> |
| Altitude     |             |           |          |                  |           |          |
| 0-2,500 masl | Ref.        |           |          | Ref.             |           |          |
| ≥2,500 masl  | 0.81        | 0.78-0.85 | <0.001   | 0.90             | 0.86-0.94 | <0.001   |

4 cPR: crude Prevalence Ratio, aPR: adjusted Prevalence Ratio, CI: Confidence Interval, masl: meters above sea level; Ref.: Reference.

5 † Model adjusted for: age, sex, BMI, daily smoker status, self-reported diabetes, area of residence, level of completed education, household wealth index.

6

7

8

9

10

11

12

13 **Table 3S.** Association between high altitude and hypertension subtypes (avoiding white coat effect) (N = 100,881).

|                                        | ISH  |           |             |                  | IDH  |           |             |                  | SDH  |           |      |           |
|----------------------------------------|------|-----------|-------------|------------------|------|-----------|-------------|------------------|------|-----------|------|-----------|
|                                        | cRPR | 95% CI    | aRPR        | 95% CI           | cRPR | 95% CI    | aRPR        | 95% CI           | cRPR | 95% CI    | aRPR | 95% CI    |
| <b>In all population (N = 100,881)</b> |      |           |             |                  |      |           |             |                  |      |           |      |           |
| 0-2,500 masl                           | Ref. |           | Ref.        |                  | Ref. |           | Ref.        |                  | Ref. |           | Ref. |           |
| ≥2,500 masl                            | 0.74 | 0.67-0.81 | <b>0.67</b> | <b>0.60-0.74</b> | 1.03 | 0.86-1.24 | <b>1.57</b> | <b>1.30-1.90</b> | 0.79 | 0.69-0.92 | 1.02 | 0.87-1.19 |

14 aRPR: adjusted relative prevalence ratio; cRPR: crude relative prevalence ratio; CI: Confidence Interval, masl: meters above sea level; ISH: Isolated Systolic

15 Hypertension; IDH: Isolated Diastolic Hypertension; SDH: Systolic-diastolic Hypertension.

16 Model adjusted for: age, sex, BMI, daily smoker status, self-reported diabetes, area of residence, level of completed education, household wealth index.

17

18

19

20

21

22 **Table 4S.** Sensitivity analysis of the association between hypertension (mean of both measurements) and altitude (0-500-2500-3500 masl) (N = 122,336).

|                  | Crude Model |           |          | Adjusted Model † |           |          |
|------------------|-------------|-----------|----------|------------------|-----------|----------|
|                  | cPR         | 95% CI    | <i>p</i> | aPR              | 95% CI    | <i>p</i> |
| Altitude         |             |           |          |                  |           |          |
| <500 masl        | Ref.        |           |          | Ref.             |           |          |
| 500-2,499 masl   | 0.88        | 0.84-0.92 | <0.001   | 0.94             | 0.90-0.98 | 0.002    |
| 2,500-3,499 masl | 0.79        | 0.75-0.83 | <0.001   | 0.88             | 0.84-0.92 | <0.001   |
| ≥3,500 masl      | 0.77        | 0.72-0.82 | <0.001   | 0.86             | 0.81-0.92 | <0.001   |

23 cPR: crude Prevalence Ratio, aPR: adjusted Prevalence Ratio, CI: Confidence Interval, masl: meters above sea level; Ref.: Reference.

24 † Model adjusted for: age, sex, BMI, daily smoker status, self-reported diabetes, area of residence, level of completed education, household wealth index.

25

26

27

28

29

30

31

32 **Table 5S.** Sensitivity analysis of the association between hypertension subtypes (average of both measurements) and altitude. (0-500-2,500-3,500) (N = 111  
 33 558).

|                                        | ISH  |           |             |                  | IDH  |           |             |                  | SDH  |           |      |           |
|----------------------------------------|------|-----------|-------------|------------------|------|-----------|-------------|------------------|------|-----------|------|-----------|
|                                        | cRPR | 95% CI    | aRPR        | 95% CI           | cRPR | 95% CI    | aRPR        | 95% CI           | cRPR | 95% CI    | aRPR | 95% CI    |
| <b>In all population (N = 111,558)</b> |      |           |             |                  |      |           |             |                  |      |           |      |           |
| <500 masl                              | Ref. |           | Ref.        |                  | Ref. |           | Ref.        |                  | Ref. |           | Ref. |           |
| 500-2,499 masl                         | 0.80 | 0.72-0.88 | <b>0.77</b> | <b>0.69-0.85</b> | 1.10 | 0.85-1.40 | <b>1.36</b> | <b>1.06-1.75</b> | 0.73 | 0.63-0.85 | 0.83 | 0.71-0.97 |
| 2,500-3,499 masl                       | 0.72 | 0.65-0.80 | <b>0.65</b> | <b>0.58-0.73</b> | 1.12 | 0.91-1.38 | <b>1.70</b> | <b>1.37-2.12</b> | 0.72 | 0.62-0.84 | 0.93 | 0.80-1.10 |
| ≥3,500 masl                            | 0.67 | 0.59-0.75 | <b>0.55</b> | <b>0.47-0.63</b> | 1.06 | 0.81-1.39 | <b>1.84</b> | <b>1.37-2.47</b> | 0.69 | 0.56-0.84 | 0.92 | 0.74-1.13 |

34 aRPR: adjusted relative prevalence ratio; cRPR: crude relative prevalence ratio; CI: Confidence Interval, masl: meters above sea level; ISH: Isolated Systolic  
 35 Hypertension; IDH: Isolated Diastolic Hypertension; SDH: Systolic-diastolic Hypertension.

36 Model adjusted for: age, sex, BMI, daily smoker status, self-reported diabetes, area of residence, level of completed education, household wealth index.

37 **Table 6S.** Sensitivity analysis of the association between hypertension (avoiding white coat effect) and altitude (0-500-2500-3500 masl) (N = 110 304).

|                  | Crude Model |           |          | Adjusted Model † |           |          |
|------------------|-------------|-----------|----------|------------------|-----------|----------|
|                  | cPR         | 95% CI    | <i>p</i> | aPR              | 95% CI    | <i>p</i> |
| Altitude         |             |           |          |                  |           |          |
| <500 masl        | Ref.        |           |          | Ref.             |           |          |
| 500-2,499 masl   | 0.89        | 0.84-0.93 | <0.001   | 0.95             | 0.91-0.99 | 0.033    |
| 2,500-3,499 masl | 0.80        | 0.75-0.84 | <0.001   | 0.89             | 0.84-0.94 | <0.001   |
| ≥3,500 masl      | 0.79        | 0.74-0.85 | <0.001   | 0.88             | 0.82-0.95 | 0.001    |

38 cPR: crude Prevalence Ratio, aPR: adjusted Prevalence Ratio, CI: Confidence Interval, masl: meters above sea level; Ref.: Reference.

39 † Model adjusted for: age, sex, BMI, daily smoker status, self-reported diabetes, area of residence, level of completed education, household

40

41

42

43

44

45

46

47

48 **Table 7S.** Sensitivity analysis of the association between hypertension subtypes (avoiding white coat effect) and altitude (0-500-2,500-3,500) (N = 100,881).

|                                        | ISH  |           |             |                  | IDH  |           |             |                  | SDH  |           |      |           |
|----------------------------------------|------|-----------|-------------|------------------|------|-----------|-------------|------------------|------|-----------|------|-----------|
|                                        | cRPR | 95% CI    | aRPR        | 95% CI           | cRPR | 95% CI    | aRPR        | 95% CI           | cRPR | 95% CI    | aRPR | 95% CI    |
| <b>In all population (N = 110,304)</b> |      |           |             |                  |      |           |             |                  |      |           |      |           |
| <500 masl                              | Ref. |           | Ref.        |                  | Ref. |           | Ref.        |                  | Ref. |           | Ref. |           |
| 500-2,499 masl                         | 0.80 | 0.72-0.90 | <b>0.77</b> | <b>0.69-0.86</b> | 1.05 | 0.84-1.30 | <b>1.33</b> | <b>1.06-1.66</b> | 0.76 | 0.64-0.90 | 0.86 | 0.72-1.03 |
| 2,500-3,499 masl                       | 0.72 | 0.65-0.81 | <b>0.64</b> | <b>0.57-0.73</b> | 1.10 | 0.88-1.38 | <b>1.71</b> | <b>1.36-2.16</b> | 0.75 | 0.63-0.89 | 0.95 | 0.79-1.15 |
| ≥3,500 masl                            | 0.68 | 0.59-0.78 | <b>0.55</b> | <b>0.47-0.64</b> | 0.94 | 0.71-1.23 | <b>1.66</b> | <b>1.24-2.23</b> | 0.77 | 0.61-0.97 | 1.02 | 0.81-1.30 |

49 aRPR: adjusted relative prevalence ratio; cRPR: crude relative prevalence ratio; CI: Confidence Interval, masl: meters above sea level; ISH: Isolated Systolic

50 Hypertension; IDH: Isolated Diastolic Hypertension; SDH: Systolic-diastolic Hypertension.

51 Model adjusted for: age, sex, BMI, daily smoker status, self-reported diabetes, area of residence, level of completed education, household wealth index.

52
